# Supplementary material for: Intrinsic mechanisms in the gating of resurgent Na+ currents
Source: eLife journal article supplement (doi:10.7554/elife.70173), 2022-01-25

Figure 4-figure supplement 1. Simulations reveal that, similar to hyperpolarizing voltage steps, prolonged depolarization results in the accumulation of Nav channels in the IS state.

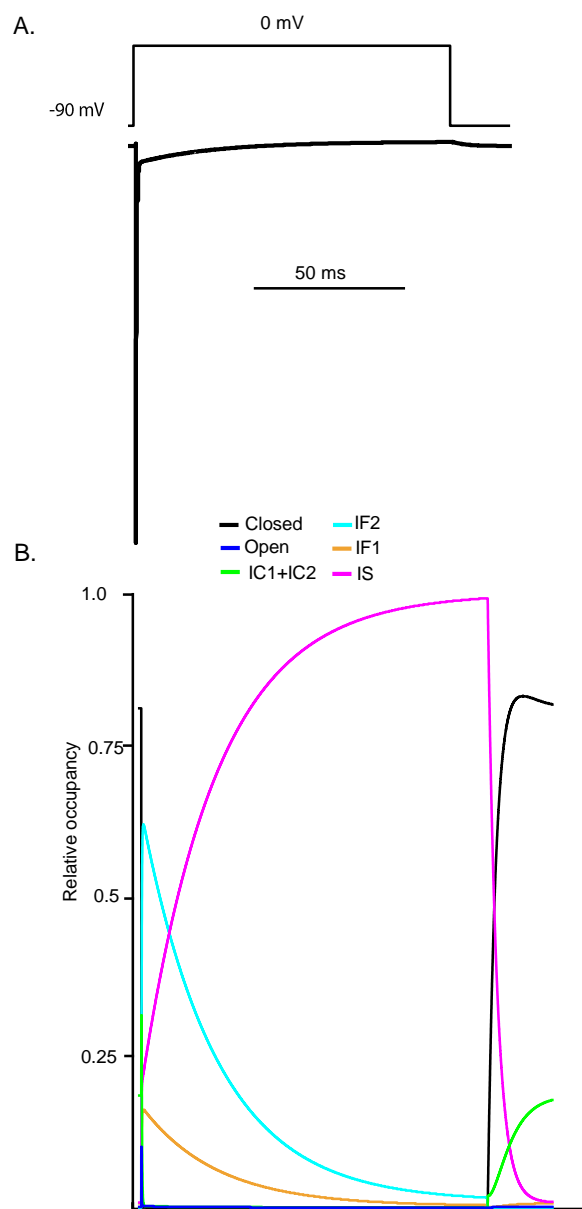

Supplement: supp [file elife_poa_e70173_Figure_4_figure_supplement_1.pdf › elife_poa_e70173_Figure_4_figure_supplement_1.pdf]
