# Supplementary material for: Intrinsic mechanisms in the gating of resurgent Na+ currents
Source: eLife journal article supplement (doi:10.7554/elife.70173), 2022-01-25

Figure 8-figure supplement 1. Gating state occupancies/transitions produced in the Raman Bean model (with the voltage-clamp protocols used in Figure 8).

A.

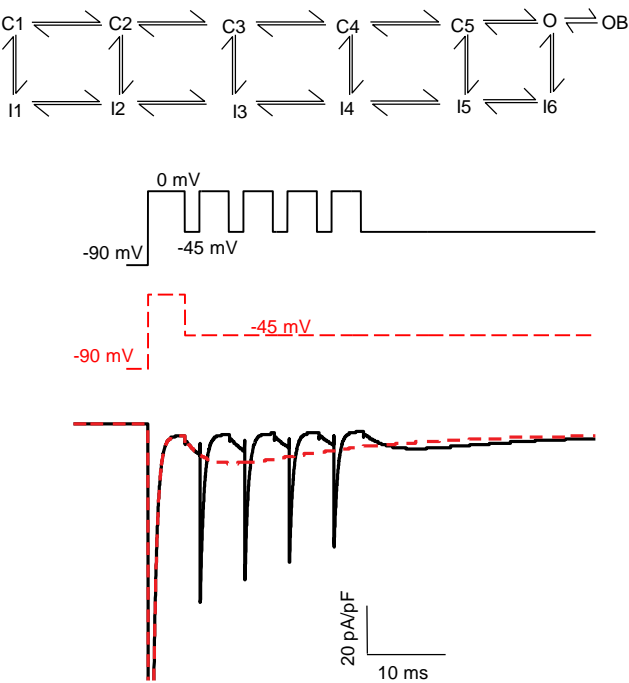

B.

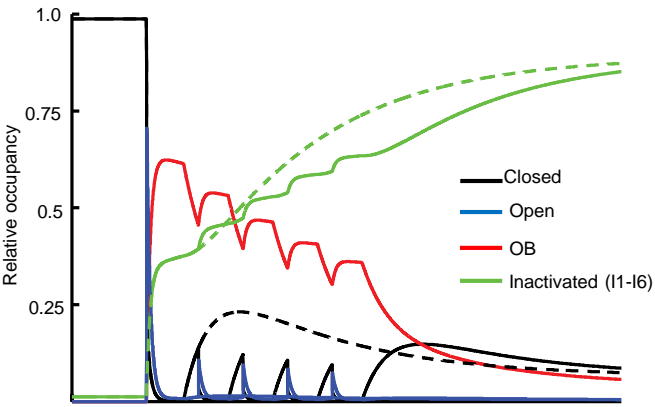

Supplement: supp [file elife_poa_e70173_Figure_8_figure_supplement_1.pdf › elife_poa_e70173_Figure_8_figure_supplement_1.pdf]
